# Supplementary material for: SPOP-mediated RIPK3 destabilization desensitizes LPS/sMAC/zVAD-induced necroptotic cell death
Source: PubMed Central journal article supplement (PMC11564579; doi:10.1007/s00018-024-05487-7), 2024-11-14

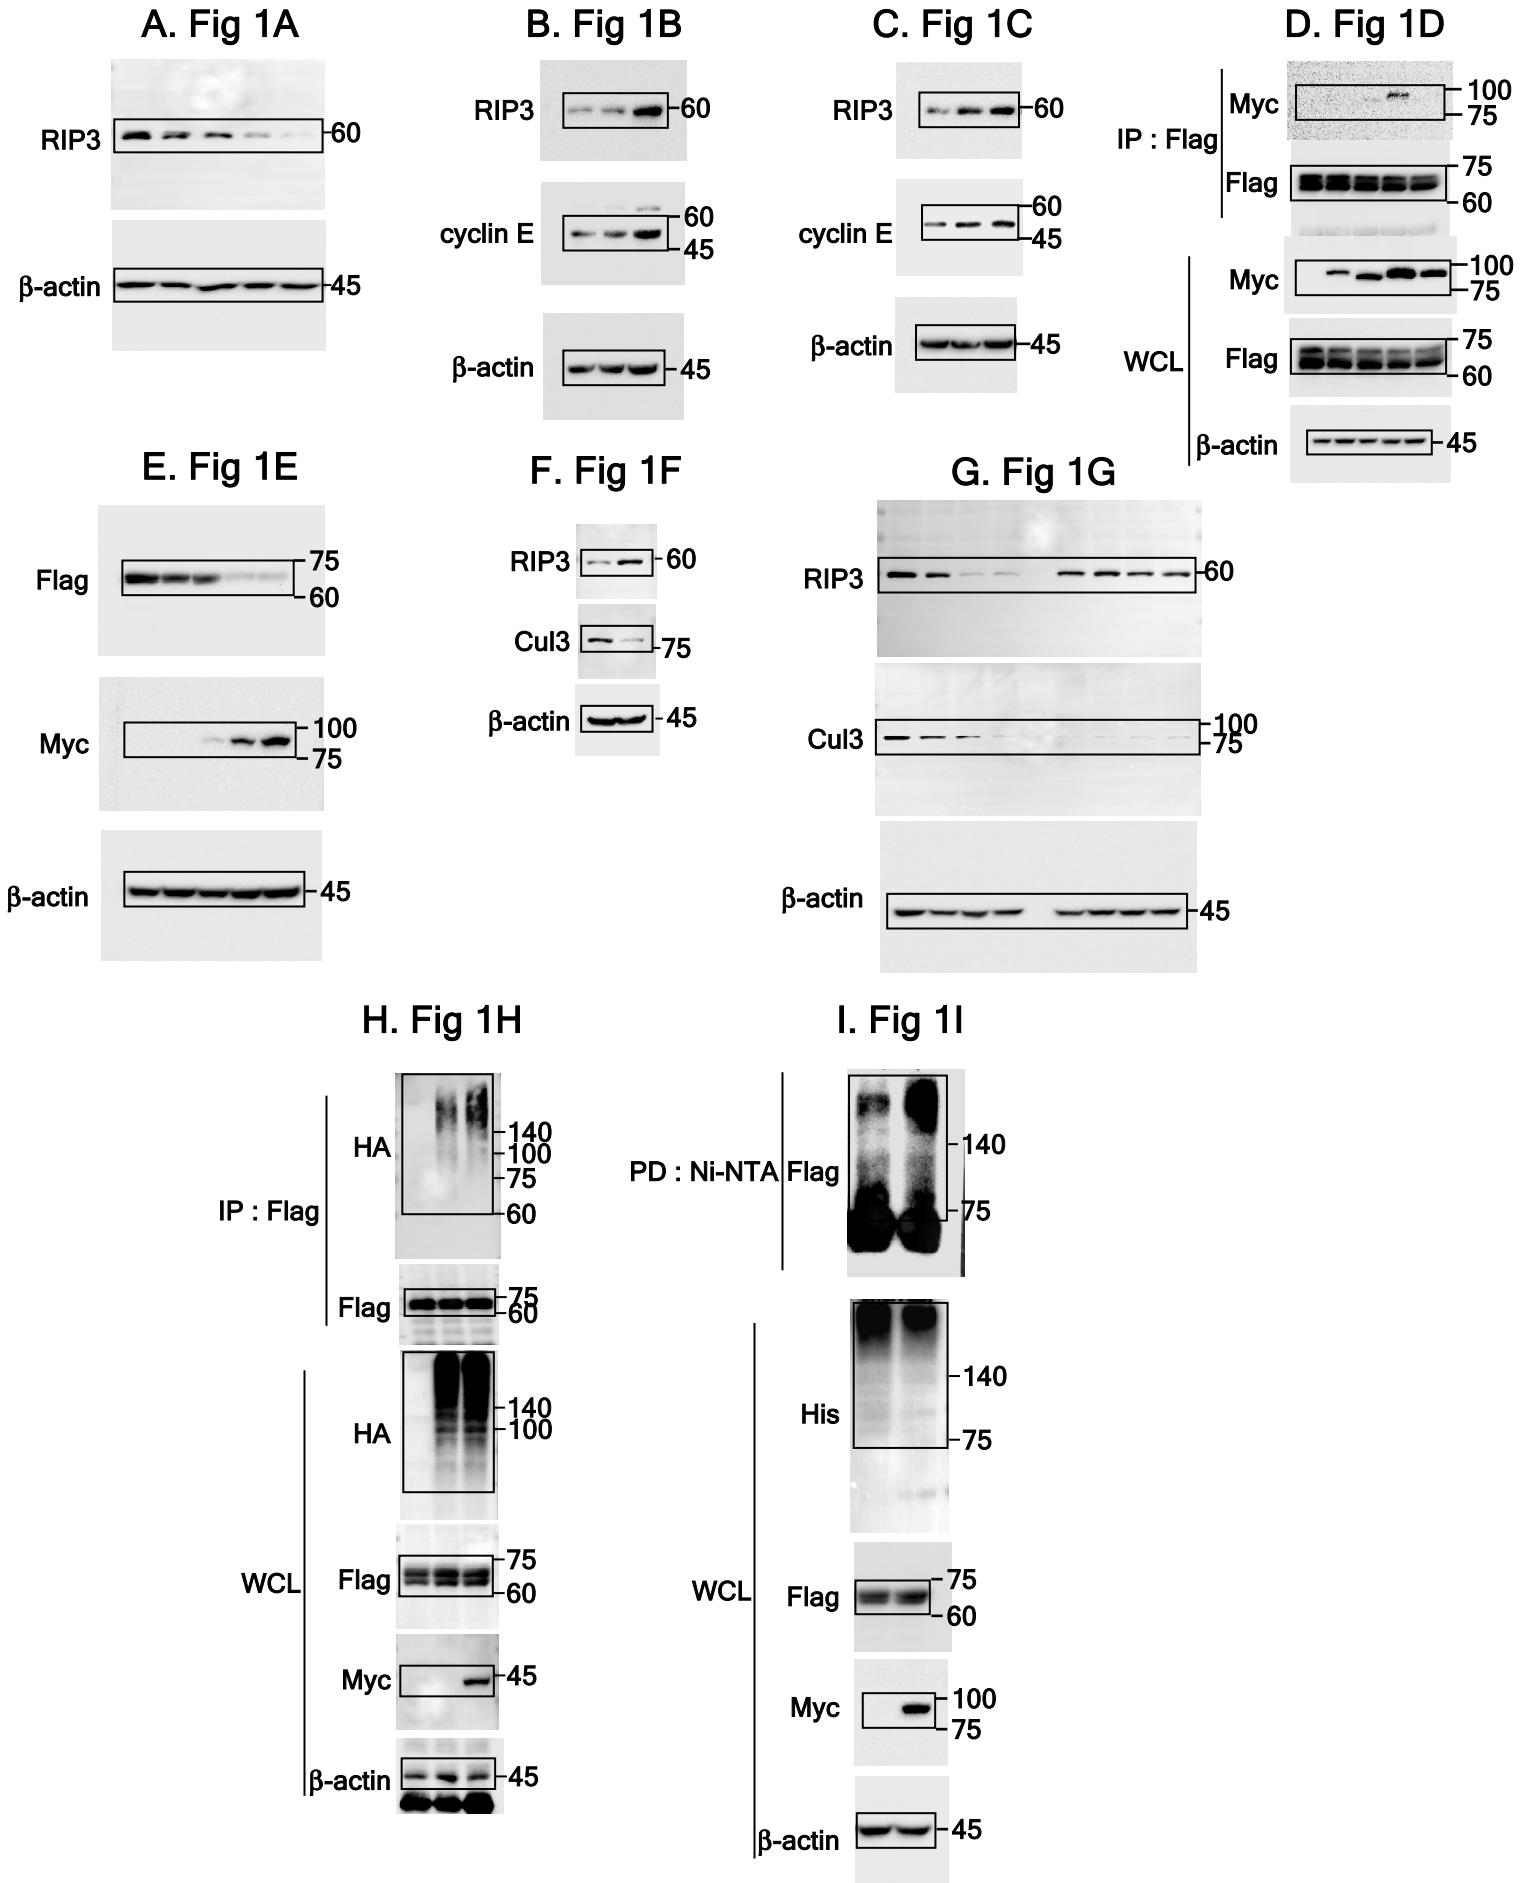

A. Fig 2B

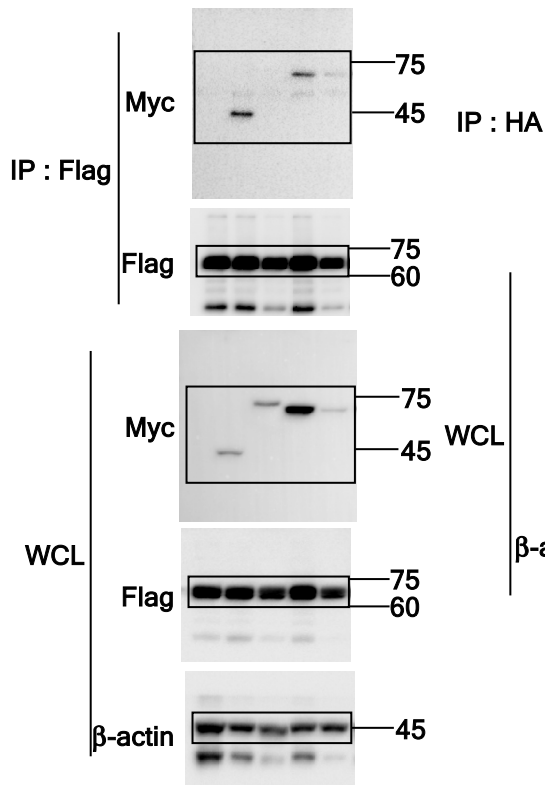

B. Fig 2C

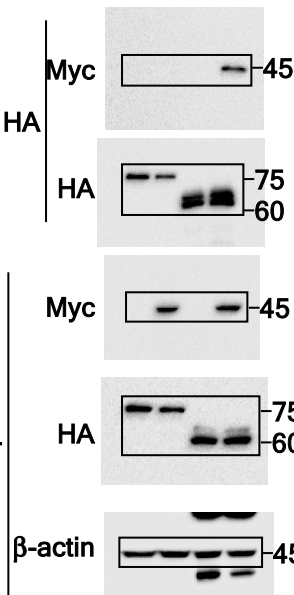

C. Fig 2D

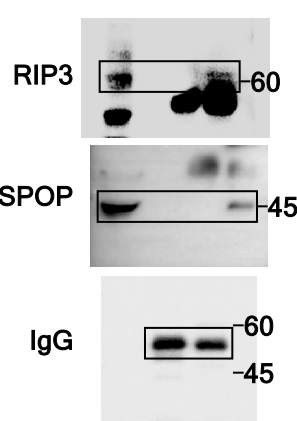

D. Fig 2E

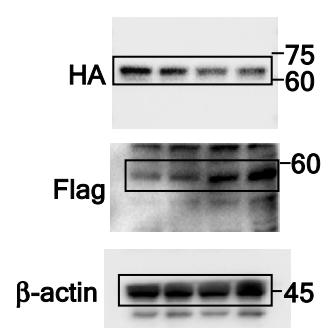

E. Fig 2F

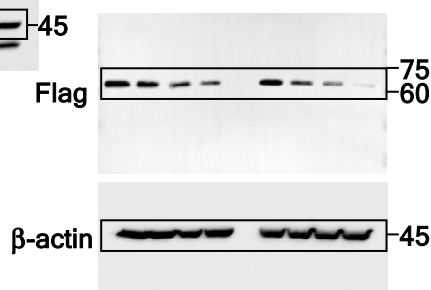

F. Fig 2G

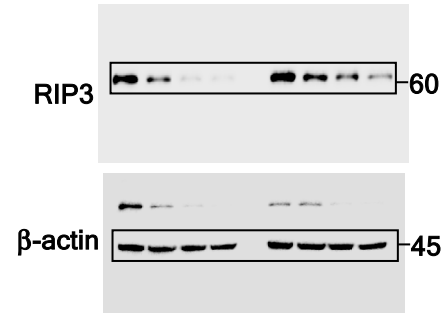

G. Fig 2H

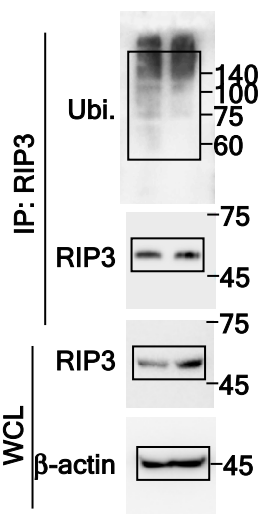

G. Fig 2I

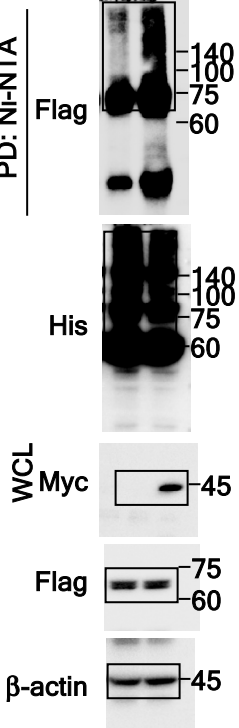

H. Fig 2J

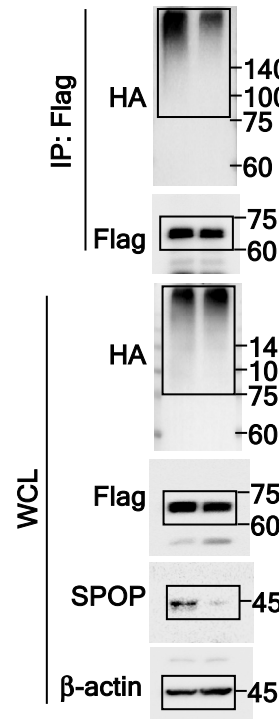

I. Fig 2K

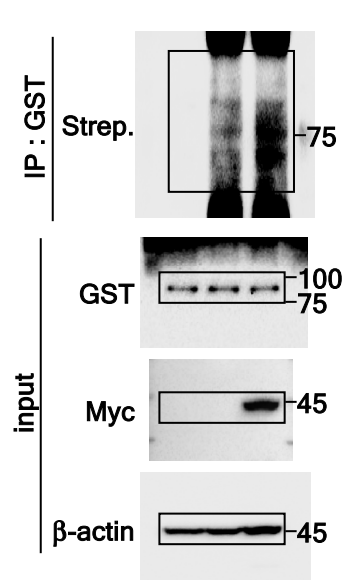

J. Fig 2L

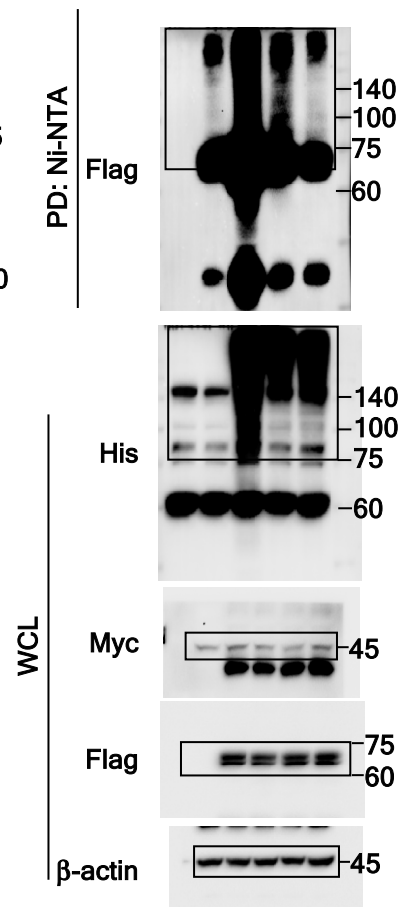

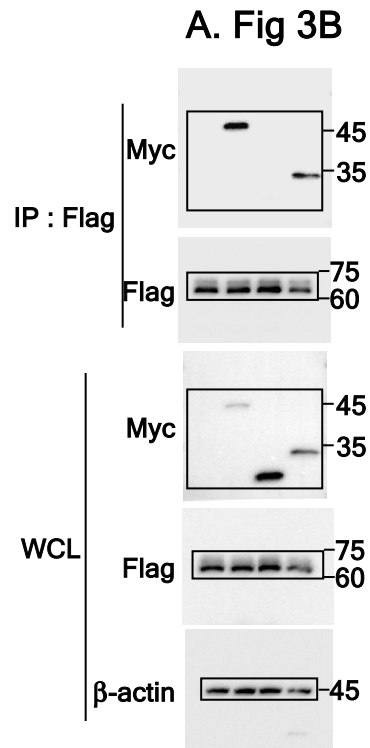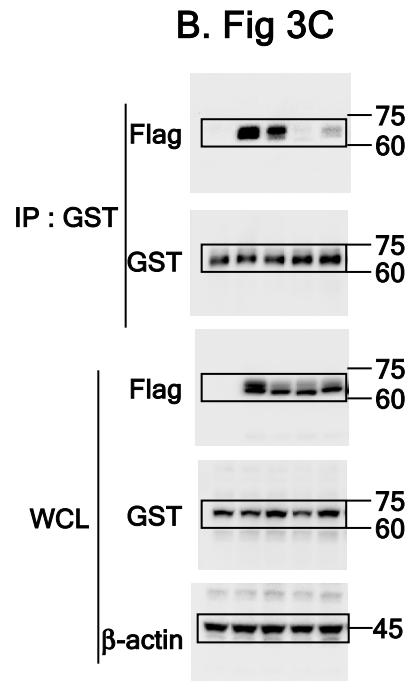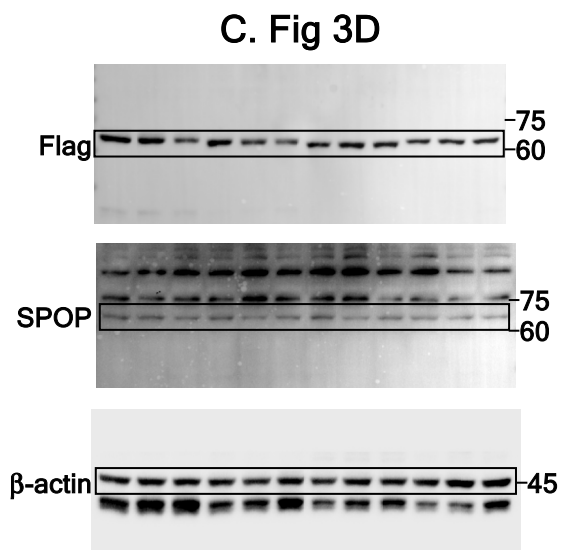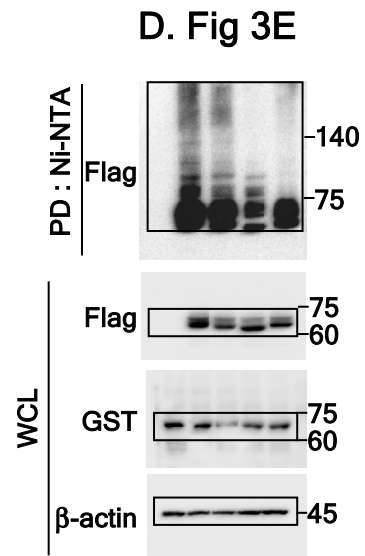

A. Fig 4A

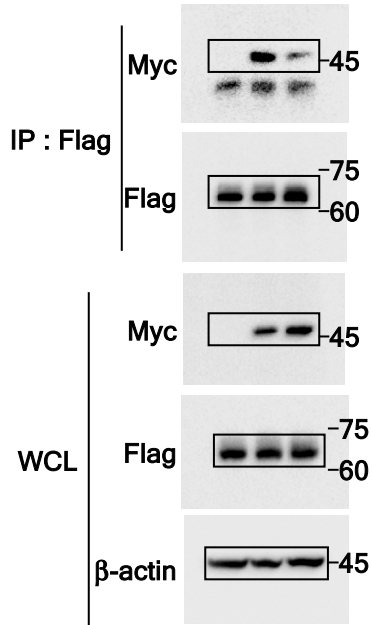

B. Fig 4C

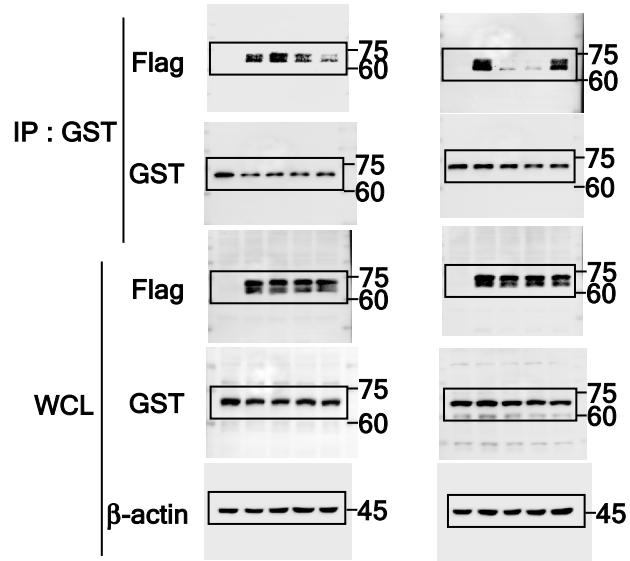

C. Fig 4D

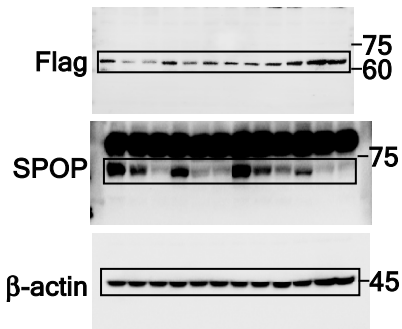

D. Fig 4E

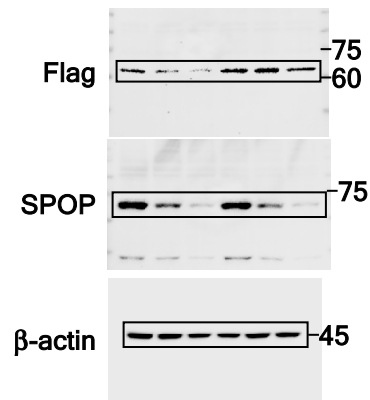

E. Fig 4F

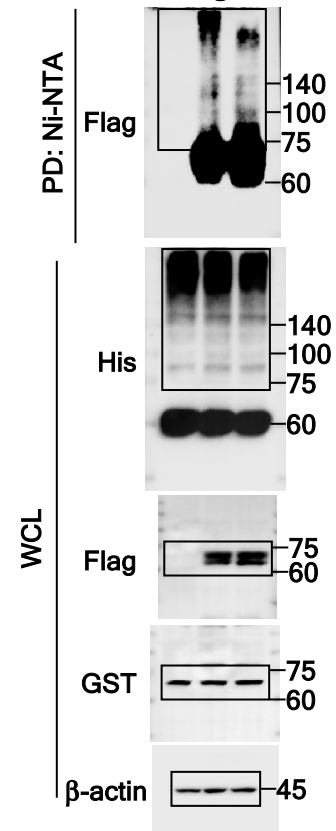

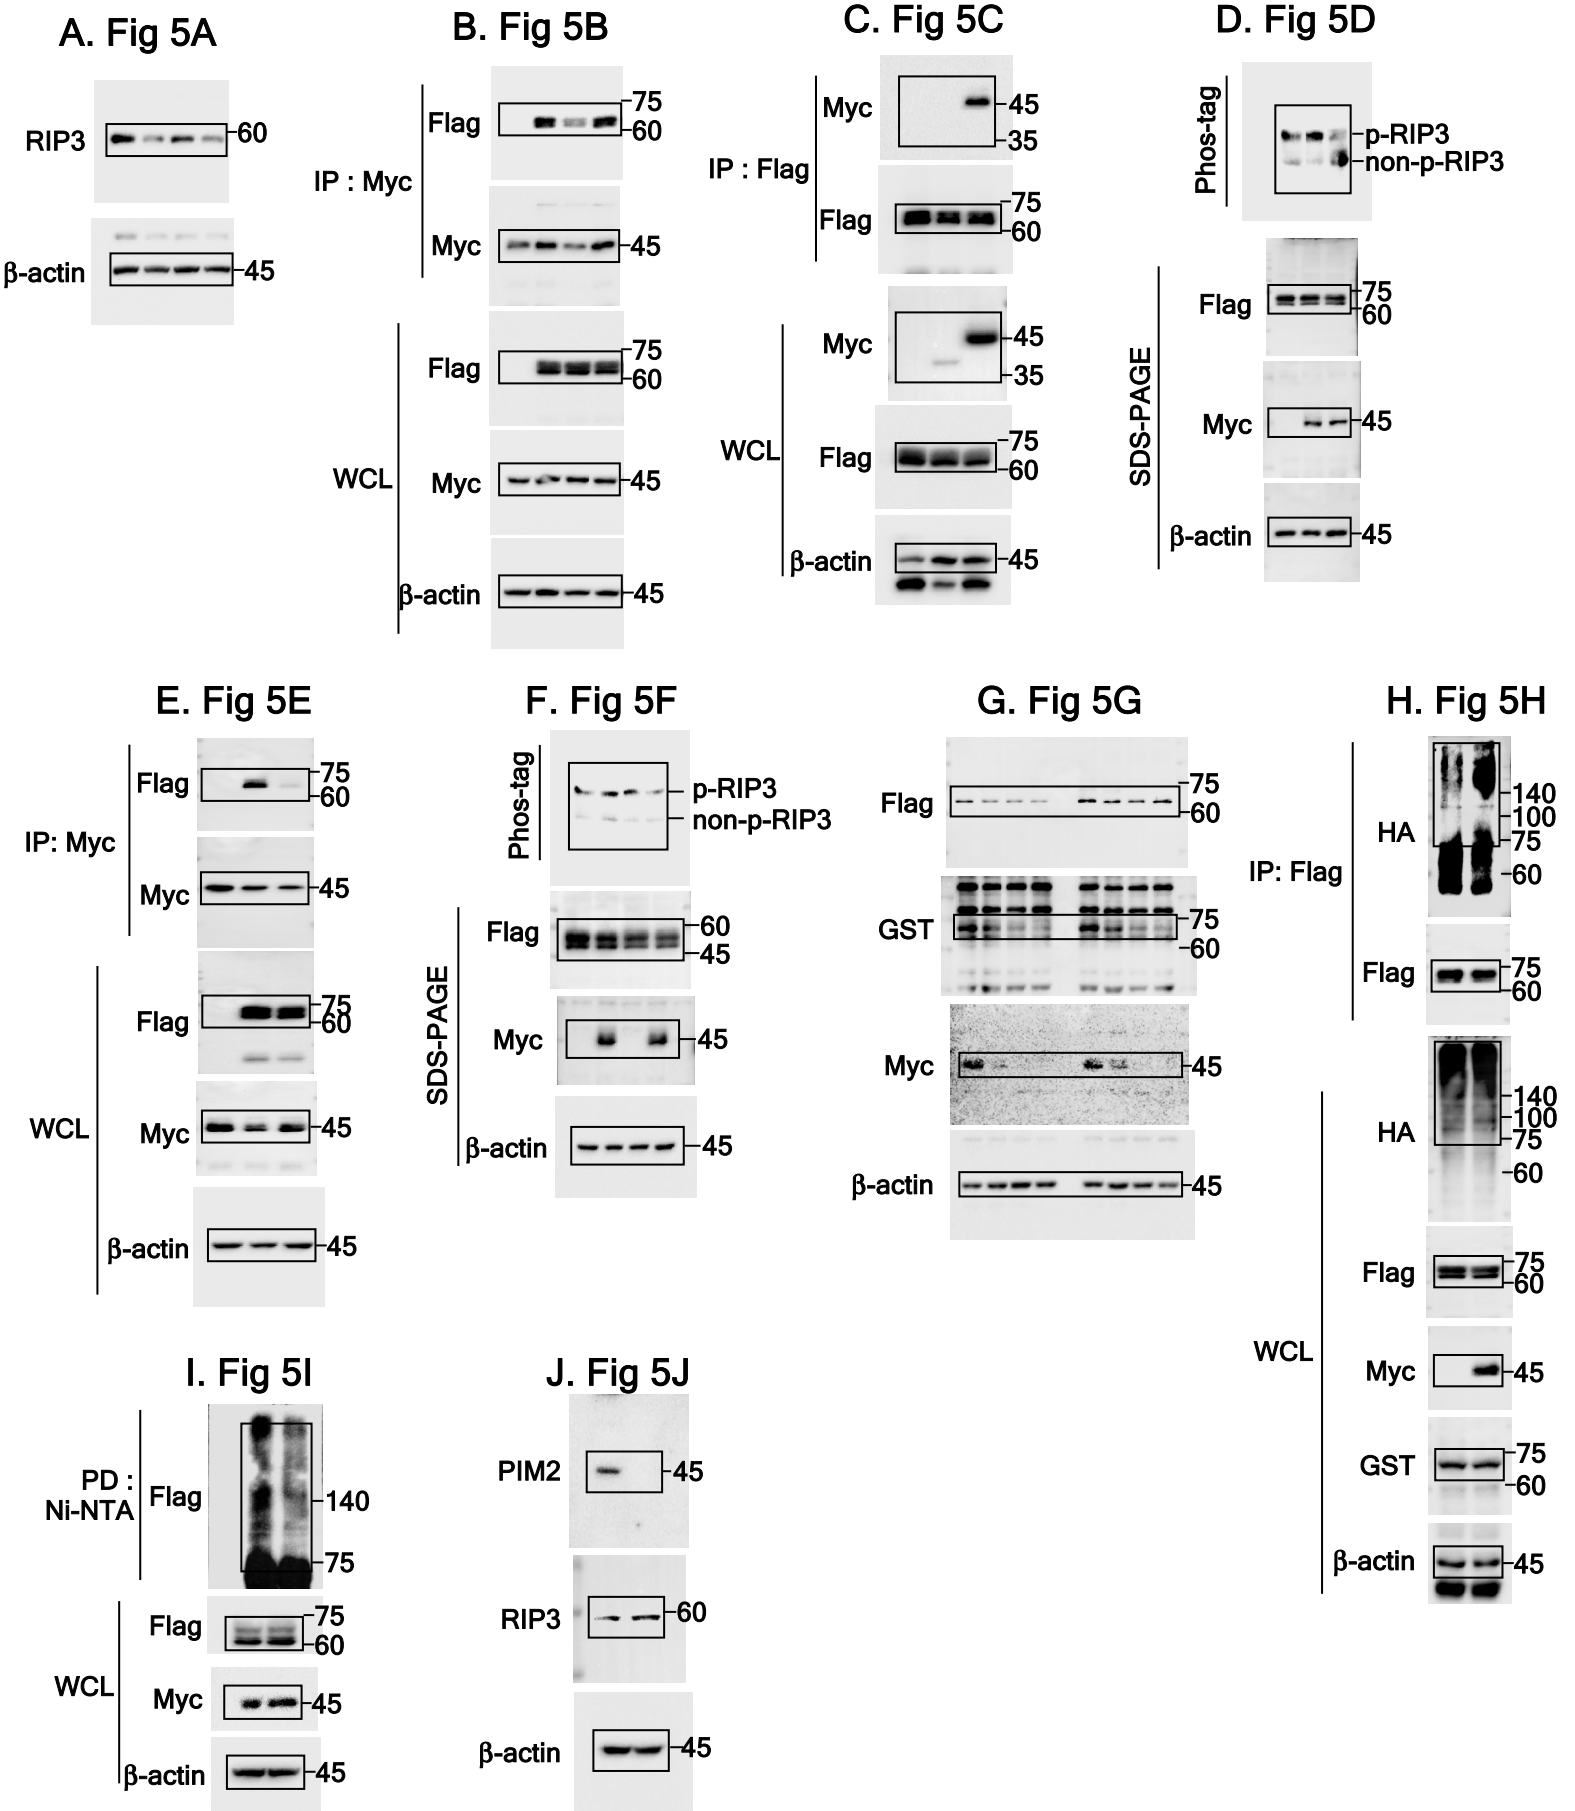

A. Fig 6A

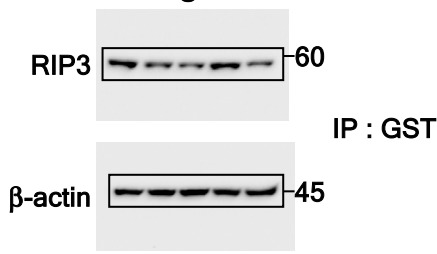

B. Fig 6B

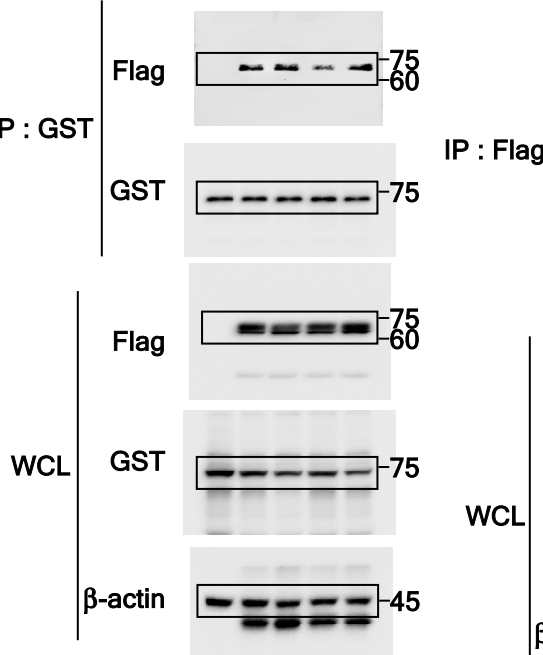

C. Fig 6C

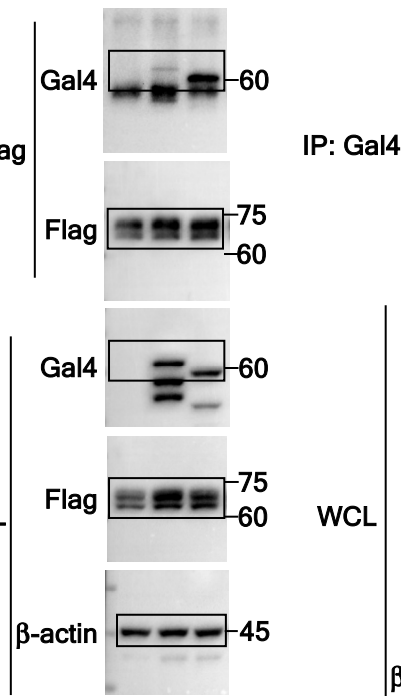

D. Fig 6D

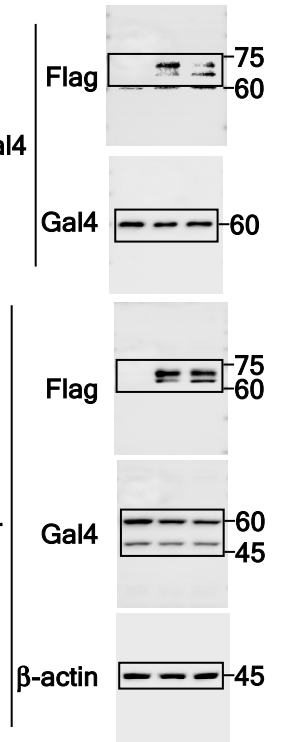

E. Fig 6E

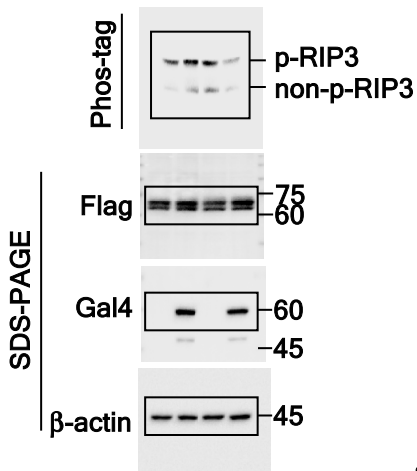

F. Fig 6F

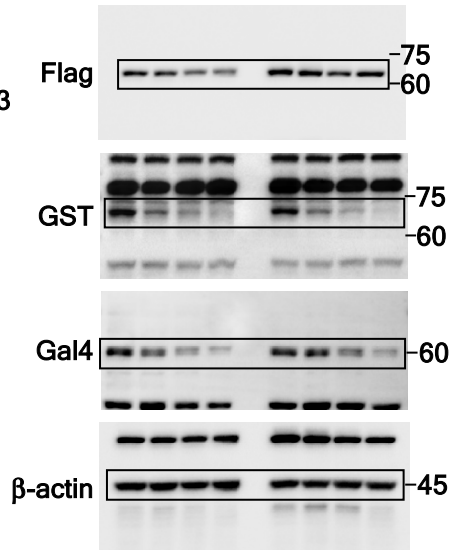

G. Fig 6G

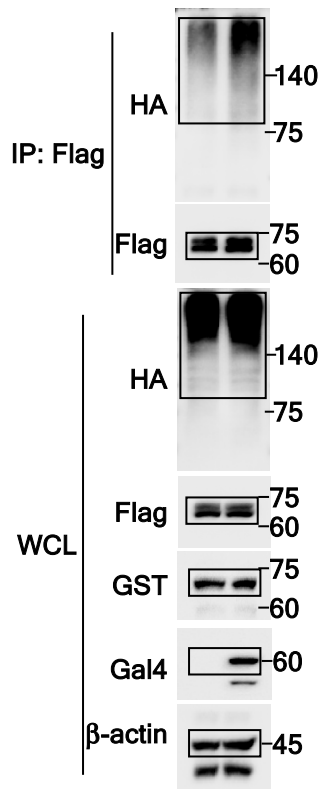

H. Fig 6H

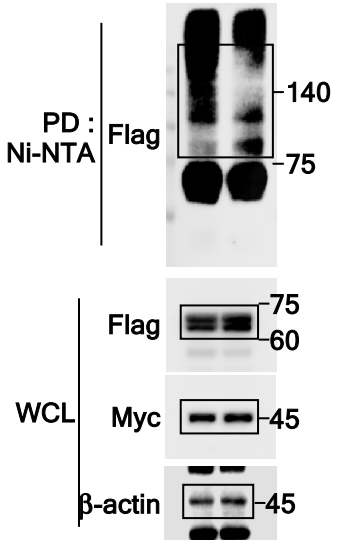

A. Fig 7A

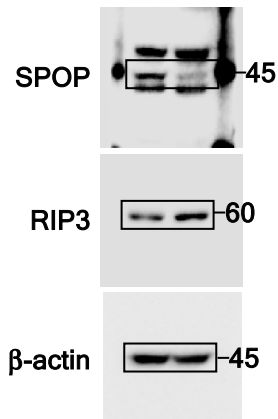

B. Fig 7D

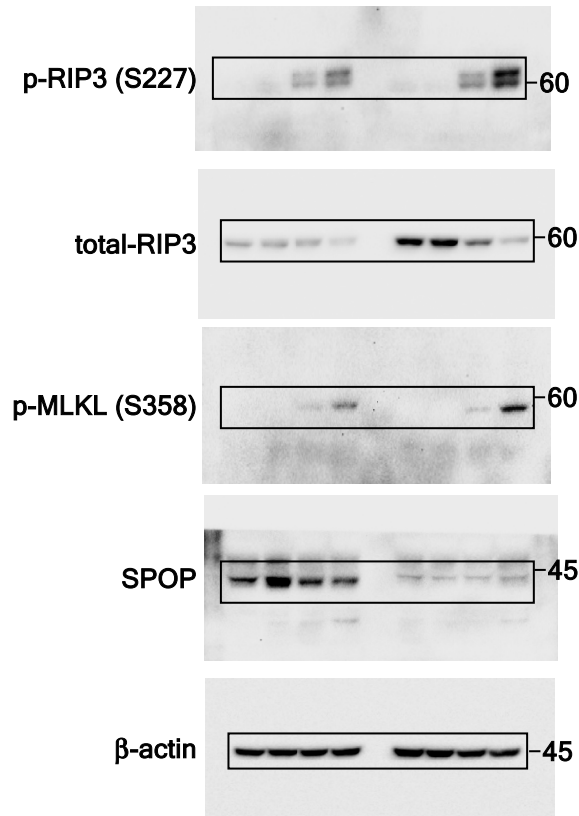

C. Fig 7E

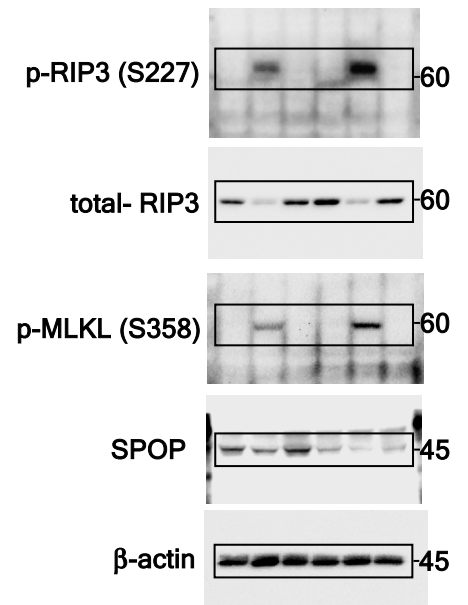

D. Fig 7F

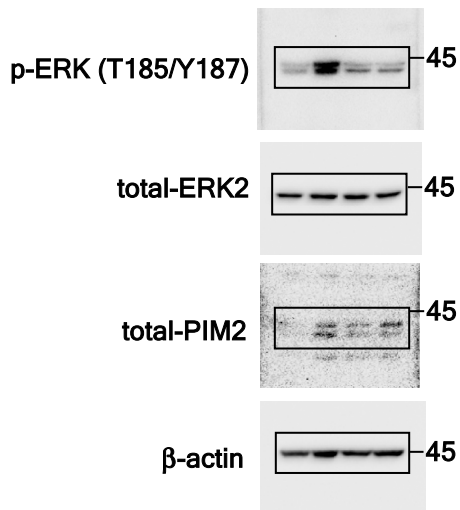

E. Fig 7G

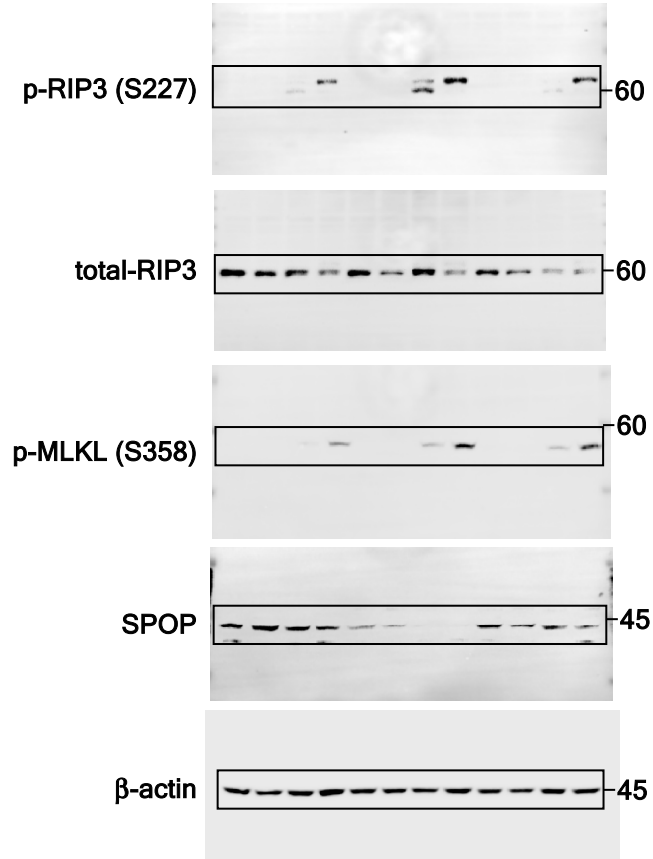

Supplementary Whole blots Fig. 1 by Lee

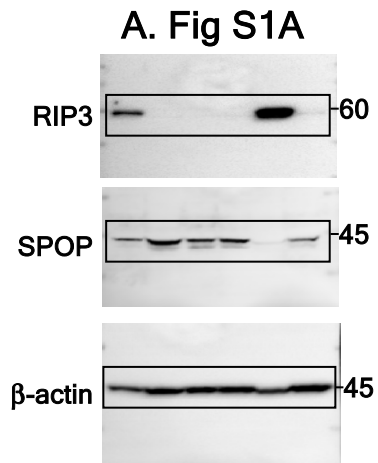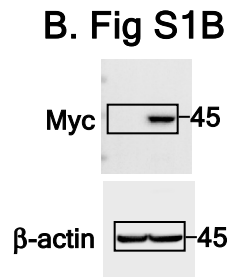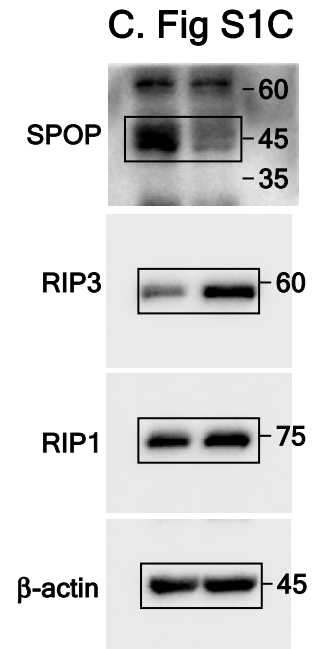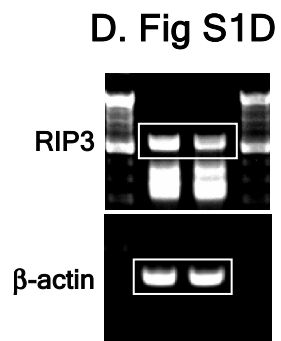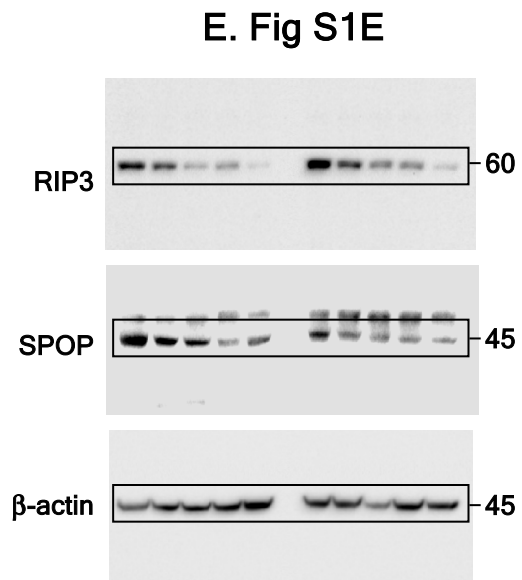

Supplement: 18_2024_5487_MOESM2_ESM.pdf [file 18_2024_5487_MOESM2_ESM.pdf]
