# Supplementary material for: SPOP-mediated RIPK3 destabilization desensitizes LPS/sMAC/zVAD-induced necroptotic cell death
Source: PubMed Central journal article supplement (PMC11564579; doi:10.1007/s00018-024-05487-7), 2024-11-14
Supplement: 18_2024_5487_MOESM1_ESM.pdf [file 18_2024_5487_MOESM1_ESM.pdf]

**[Supplementary information]**

**SPOP-mediated RIPK3 destabilization desensitizes LPS/sMAC/zVAD-induced necroptotic cell death**

Ga-Eun Lee<sup>1,2</sup>, Geul Bang<sup>3</sup>, Jiin Byun<sup>1</sup>, Weidong Chen<sup>1</sup>, Dohyun Jeung<sup>1</sup>, Hana Cho<sup>4</sup>, Joo Young Lee<sup>1,5</sup>, Han Chang Kang<sup>3,5</sup>, Hye Suk Lee<sup>1,5</sup>, Jin Young Kim<sup>3</sup>, Kwang Dong Kim<sup>6</sup>, Wu Juan<sup>1</sup>, Soo Bin Nam<sup>2</sup>, Young Jik Kwon<sup>7</sup>, Cheol-Jung Lee<sup>2,\*</sup>, and Yong-Yeon Cho<sup>1,5,\*</sup>

**Contents:**

- 1. One Supplementary Table: Supplementary Table 1**
- 2. Five Supplementary Figures: Supplementary Fig. 1-5**

Supplementary Table 1. Comparison of binding energy and interaction amino acid residues involved in SPOP and RIPK3 interaction. For ZDock, wildtype, D, and E mutants of RIPK3 at putative degron motifs of RIPK3 were used for the ZDock.

| ZDock Score between RIPK3 and SPOP |            |        |              | ZDock Score between p-RIPK3 and SPOP |        |              |                  |        |              |
|------------------------------------|------------|--------|--------------|--------------------------------------|--------|--------------|------------------|--------|--------------|
| ZRank Score -58.677 kcal/mol       |            |        |              | -105.082 kcal/mol                    |        |              | -89.577 kcal/mol |        |              |
| Interaction type                   | amino acid |        | Distance (Å) | amino acid                           |        | Distance (Å) | amino acid       |        | Distance (Å) |
|                                    | RIPK3      | SPOP   |              | RIPK3                                | SPOP   |              | RIPK3            | SPOP   |              |
| Hydrogen bond                      | Gly249     | Asp77  | 2.31         | Asn424                               | Met35  | 2.19         | Gln247           | Met48  | 2.49         |
|                                    | Thr401     | Gln127 | 2.99         | Thr401                               | Gly26  | 2.11         | Gly249           | Asp77  | 2.03         |
|                                    | Gln425     | Ala116 | 2.32         | Pro411                               | Lys31  | 3.03         | Thr401           | Gln127 | 2.02         |
|                                    | Leu245     | Lys81  | 2.53         | Asp412                               | Lys31  | 2.04         | Arg405           | Gly128 | 2.43         |
|                                    | Ala248     | Lys81  | 3.06         | Pro411                               | Lys31  | 2.75         | Glu244           | Lys74  | 2.64         |
|                                    | Gly249     | Lys81  | 2.91         | Asn424                               | Met35  | 2.02         | Gly249           | Lys81  | 2.87         |
|                                    | Asn424     | Lys115 | 2.43         | Asp413                               | Lys101 | 2.34         | Glu413           | Tyr87  | 3.08         |
|                                    | Gln425     | Glu118 | 2.22         | Pro409                               | Lys101 | 2.50         | Thr401           | Gln127 | 3.09         |
|                                    | Ser389     | Arg121 | 2.22         | Trp348                               | Lys115 | 2.80         | Phe404           | Lys129 | 1.84         |
|                                    | Thr387     | Arg121 | 2.21         | Glu244                               | Lys134 | 2.81         | Asp390           | Lys129 | 1.98         |
|                                    | Asp390     | Lys129 | 2.75         | Arg236                               | Glu79  | 3.42         | Glu412           | Gly132 | 2.13         |
|                                    | Phe404     | Lys129 | 1.84         | Pro421                               | Glu113 | 3.79         | Glu413           | Lys134 | 1.97         |
|                                    | Asp390     | Trp131 | 2.96         |                                      |        |              | Gly249           | Ser80  | 3.73         |
|                                    | Thr416     | Lys134 | 2.10         |                                      |        |              | Asp390           | Lys129 | 3.02         |
|                                    | Ser413     | Lys134 | 2.63         |                                      |        |              |                  |        |              |
|                                    | Gly249     | Ser80  | 2.98         |                                      |        |              |                  |        |              |
|                                    | Lys364     | Asp77  | 3.14         |                                      |        |              |                  |        |              |
| Thr412                             | Gly132     | 3.48   |              |                                      |        |              |                  |        |              |
| Electrostatic interaction          | Lys282     | Asp77  | 5.29         | Arg236                               | Glu79  | 3.49         | Lys364           | Asp77  | 5.01         |
|                                    | Lys282     | Glu78  | 2.95         | Arg239                               | Glu79  | 4.72         | Arg405           | Asp130 | 4.07         |
|                                    | Lys364     | Glu78  | 4.59         | Glu251                               | Lys115 | 4.86         | Glu244           | Lys74  | 4.31         |
|                                    | Arg405     | Asp130 | 5.50         | Glu347                               | Arg138 | 5.20         | Asp390           | Lys129 | 3.59         |
|                                    | Glu244     | Lys74  | 4.64         |                                      |        |              | Phe404           | Lys129 | 4.43         |
|                                    | Gln425     | Lys103 | 4.99         |                                      |        |              |                  |        |              |
| Phe404                             | Lys129     | 3.87   |              |                                      |        |              |                  |        |              |
| Hydrophobic interaction            | Ala248     | Met48  | 3.35         | Pro409                               | Val129 | 5.26         | Ala248           | Met48  | 3.48         |
|                                    | Ala248     | Lys81  | 3.97         | Pro409                               | Val164 | 5.44         | Ala248           | Lys81  | 3.96         |
|                                    | Arg405     | Lys129 | 4.89         | Pro421                               | Leu107 | 4.63         | Arg405           | Lys129 | 4.36         |
|                                    | Met408     | Lys129 | 5.13         | Lys351                               | Ala116 | 4.46         | Met408           | Lys129 | 5.09         |
|                                    | Phe404     | Val126 | 4.99         | Val343                               | Ala146 | 4.76         | Phe404           | Val126 | 5.09         |
|                                    |            |        | Pro421       | Phe158                               | 4.52   | Met408       | Trp131           | 4.08   |              |
| Hydrogen bond :                    | Lys351     | Glu79  | 2.19         |                                      |        |              | Lys282           | Glu78  | 2.05         |
|                                    | Lys364     | Asp77  | 3.28         |                                      |        |              | Lys351           | Glu79  | 2.85         |
| Electrostatic interaction          | Glu251     | Lys81  | 1.95         |                                      |        |              | Glu251           | Lys81  | 2.07         |
|                                    | Asp390     | Lys129 | 1.73         |                                      |        |              |                  |        |              |
| Other                              | Met408     | Asp130 | 3.27         | Arg422                               | Met35  | 3.06         | Met408           | Trp131 | 2.65         |
|                                    | Met408     | Trp131 | 3.25         |                                      |        |              |                  |        |              |

Supplementary Table 1 Detailed information on SPOP and RIPK3 docking. The blue letters indicate the degron motifs suggested in Fig. 3C.

Suppl Fig. 1 A+B+C+D+E by GE Lee

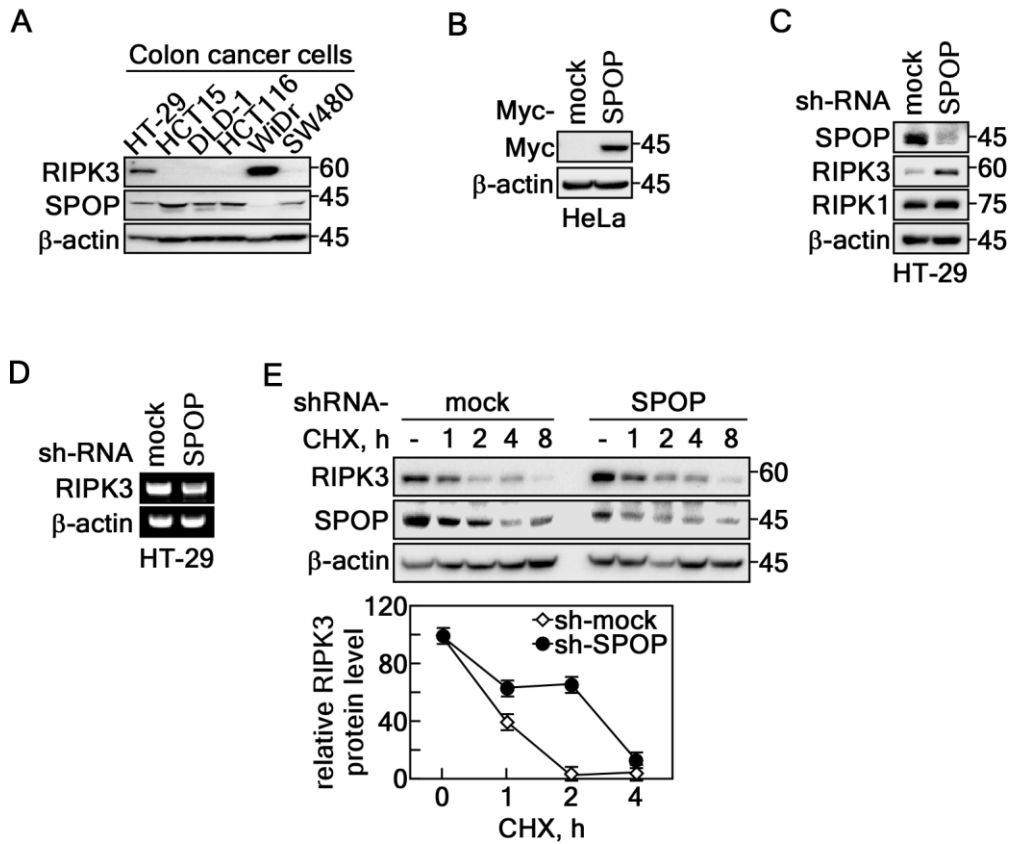

**Supplementary Fig. 1** SPOP regulates the RIPK3 half-life. **A** Confirmation of the RIPK3 and SPOP protein levels in colon cancer cells, such as HT-29, HCT15, DLD-1, HCT116, WiDr, and SW480. **B** Confirmation of SPOP overexpression in HeLa cells. **C** SPOP knockdown by sh-SPOP increased RIPK3, but not RIPK1, in HT-29 cells. **D** SPOP knockdown-mediated RIPK3 reduction was not caused by RIPK3 gene expression in HT-29 cells. **E** Measurement of the prolonged RIPK3 half-life by SPOP knockdown HT-29 cells. The error bars from a triplicate experiment indicate SEM.

Suppl Fig. 2 by GE Lee

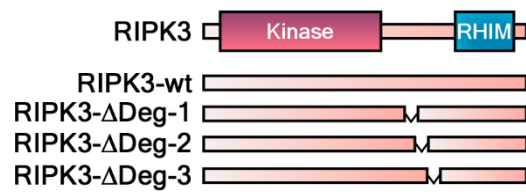

**Supplementary Fig. 2** Illustration showing the maps of SPOP and RIPK3. Schematic maps for degnon motif deletion mutants of RIPK3.  $\Delta$ Deg-1, deleted aa 385-389;  $\Delta$ Deg-2, deleted aa 399-403; and  $\Delta$ Deg-3, deleted aa 410-414.

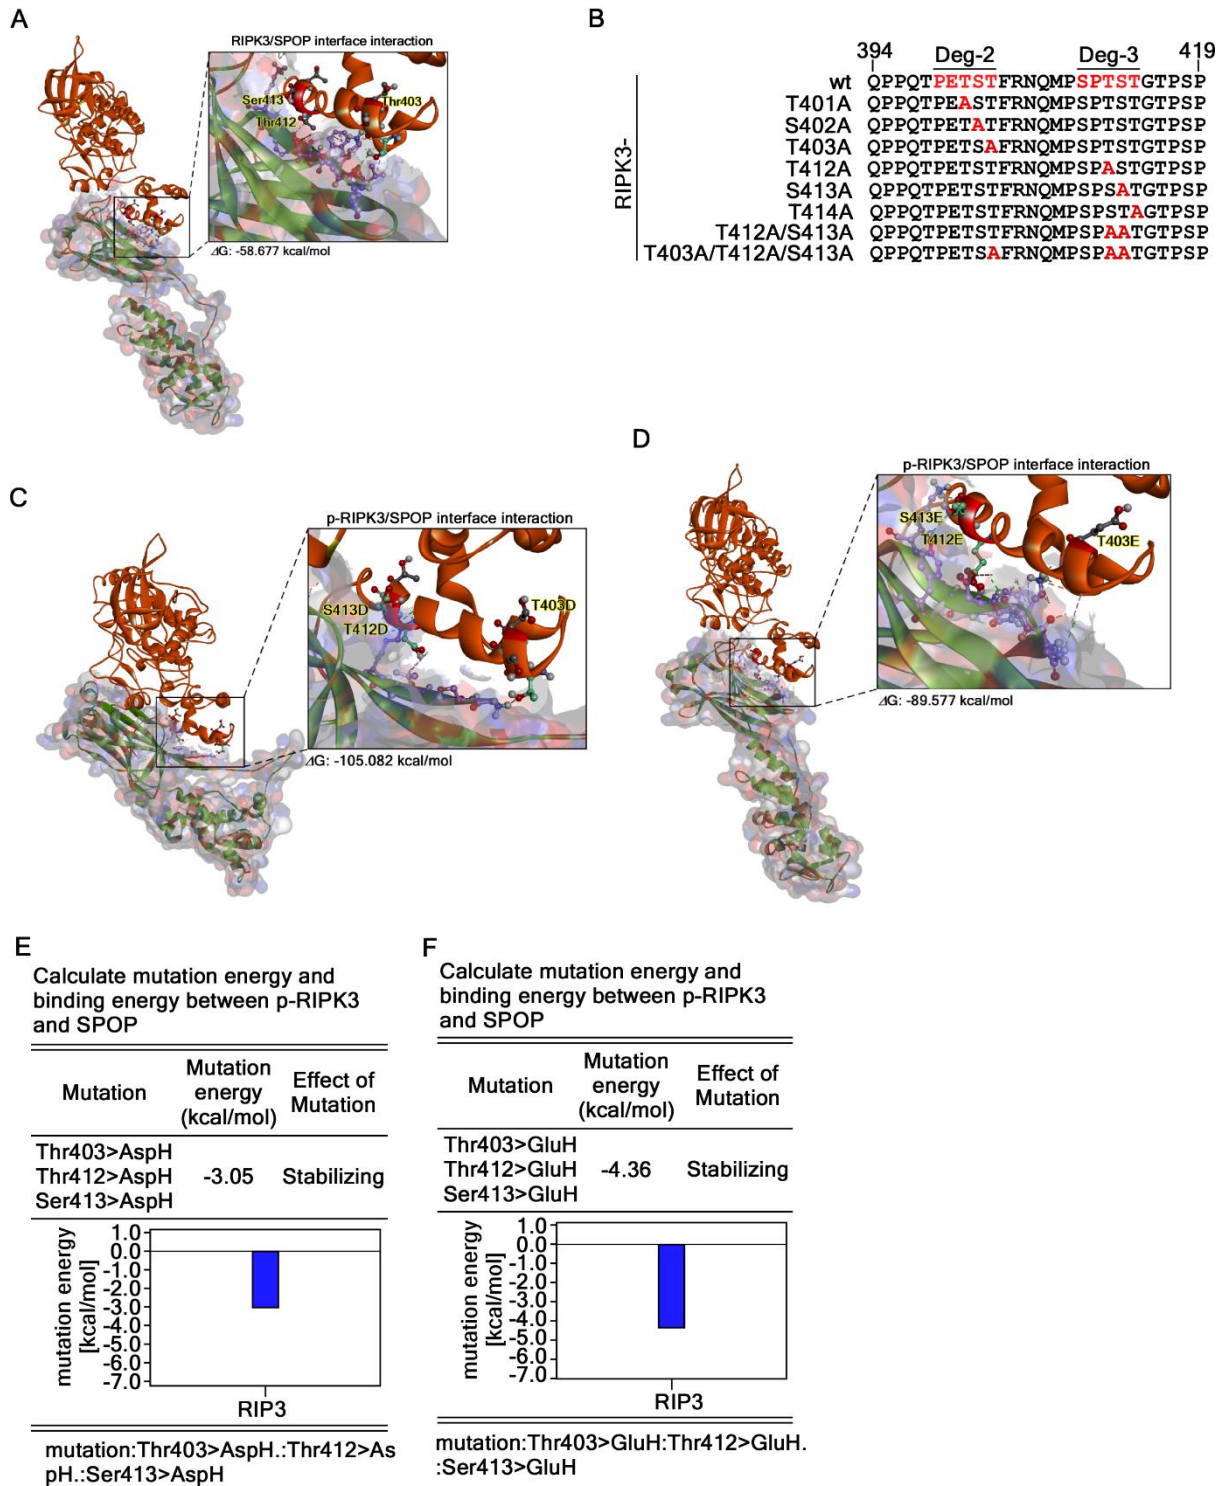

**Supplementary Fig. 3** Phospho-mimetic mutations of RIPK3 at the degreon motifs affect complex stability. **A** Full picture of the docking interface between SPOp and RIPK3-wt. The magnified boxed area is shown in **Fig. 4B**. **B** Mutation strategy of RIPK3 at Deg-2 and Deg-3. **C-D** Full pictures of the

docking interface between SPOP and RIPK3-TTS/DDD or -TTS/EEE. The magnified boxed area is shown in **Fig. 4G. E-F** Valuation of the binding effect for the complex stabilization between SPOP and RIPK3-TTS/DDD or -TTS/EEE.

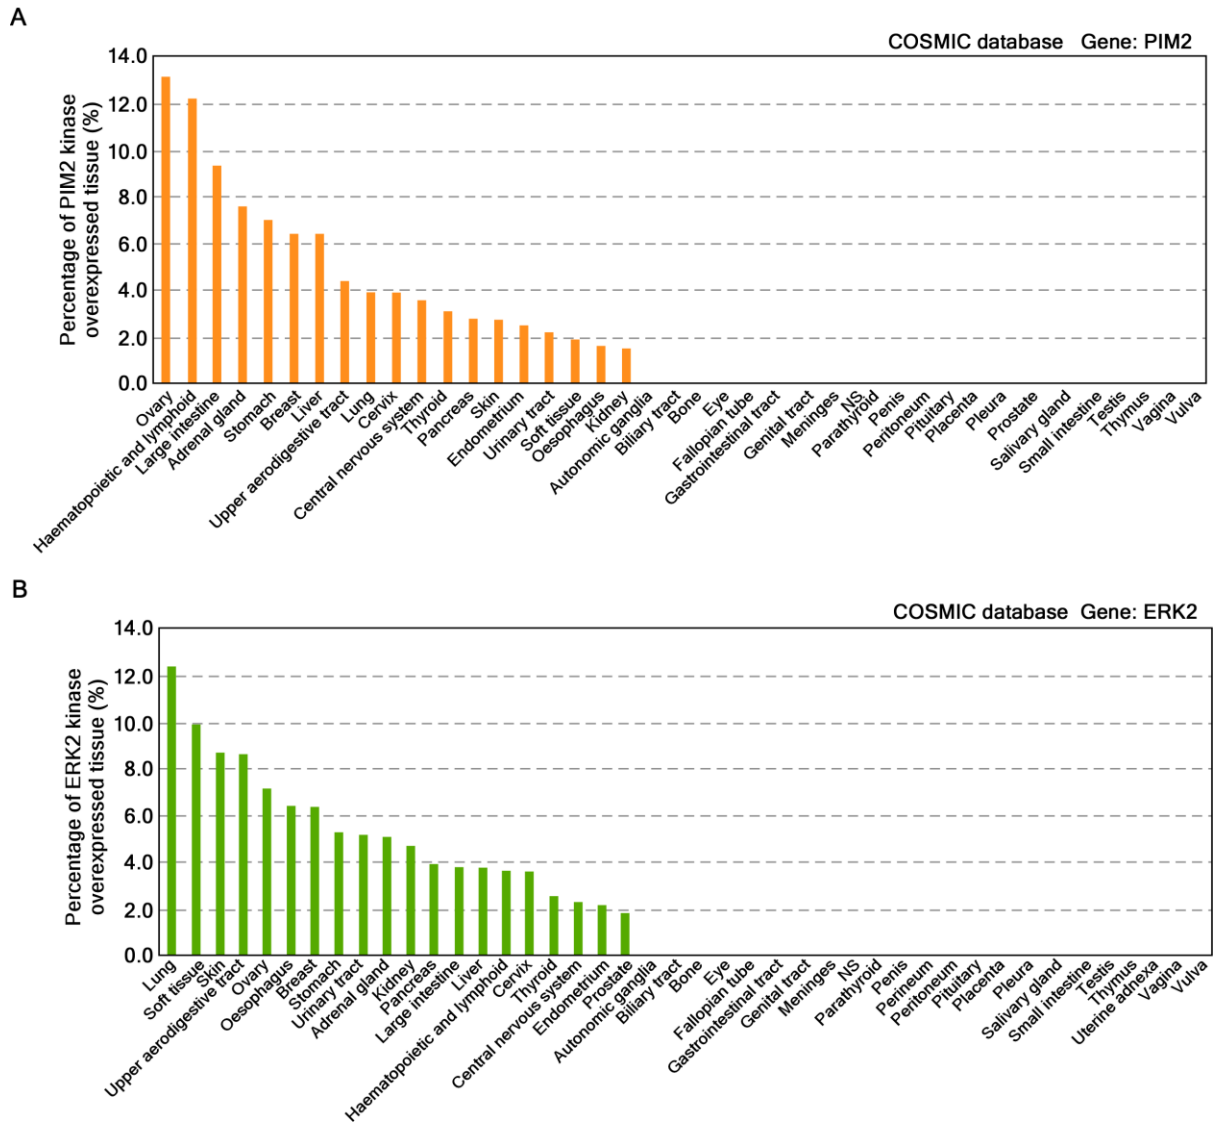

**Supplementary Fig. 4** Comparison of the ERK2 and PIM2 protein levels in cancer tissues. **A-B** COSMIC database was used to analyze the expression levels of ERK2 (**A**) and PIM2 (**B**) in various human cancer tissues.

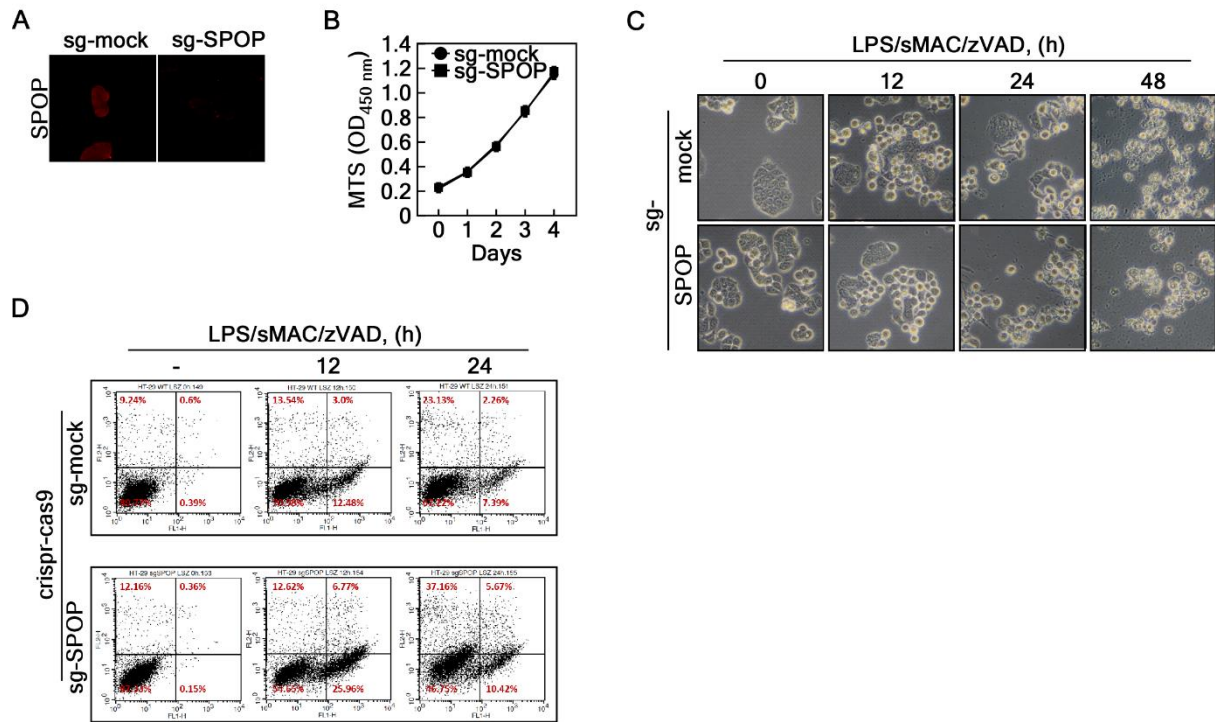

**Supplementary Fig. 5** SPOP knockout sensitized LSZ-induced necroptosis. **A** Illustration confirming SPOP knockout using sg-SPOP by ICF analysis under a confocal microscope in HT-29 cells. **B** SPOP knockout did not affect cell proliferation under normal cell culture conditions analyzed by the MTS assay in HT-29 cells. **C** SPOP knockout sensitized LSZ-induced necroptotic cell death morphology observed by phase-contrast optical microscopy ( $\times 200$ ) in HT-29 cells. **D** Genetic depletion of SPOP-sensitized LSZ-induced cell death measured by flow cytometry in HT-29 cells. The measured cell populations were divided into AV<sup>-</sup>/PI<sup>-</sup> (alive cells), AV<sup>+</sup>/PI<sup>-</sup> (early apoptotic cells), AV<sup>-</sup>/PI<sup>+</sup> (early necrosis/necroptosis cells), and AV<sup>+</sup>/PI<sup>+</sup> (late apoptosis and necrosis/necroptosis cells). These supplementary data support **Fig. 7C**.
